# Supplementary material for: Stachydrine ameliorates the progression of intervertebral disc degeneration via the PI3K/Akt/NF-κB signaling pathway: in vitro and in vivo studies
Source: Royal Society of Chemistry journal article supplement (doi:10.1039/d0fo02323j), 2020-01-01
Supplement: d0fo02323j1.pdf [file d0fo02323j1.pdf]

**Supplemental Table 1 Primers used for mRNA expression studies using PCR**

| Gene          | Forward primer (5'->3')  | Reverse primer (3'->5') |
|---------------|--------------------------|-------------------------|
| COX-2         | GAGAGATGTATCCTCCCACAGTCA | GACCAGGCACCAGACCAAAG    |
| iNOS          | CCTTACGAGGCGAAGAAGGACAG  | CAGTTTGAGAGAGGAGGCTCCG  |
| IL-6          | GACAGCCACTCACCTCTTCA     | TTCACCAGGCAAGTCTCCTC    |
| TNF- $\alpha$ | GTCAGATCATCTTCTCGA ACC   | CAGATAGATGGGCTCATACC    |
